# Supplementary material
Source: Springer Nature journal article supplement (https://www.springermedizin.de/resource/supplementary/12936_2011_2071_MOESM1_ESM.pdf/9543362)

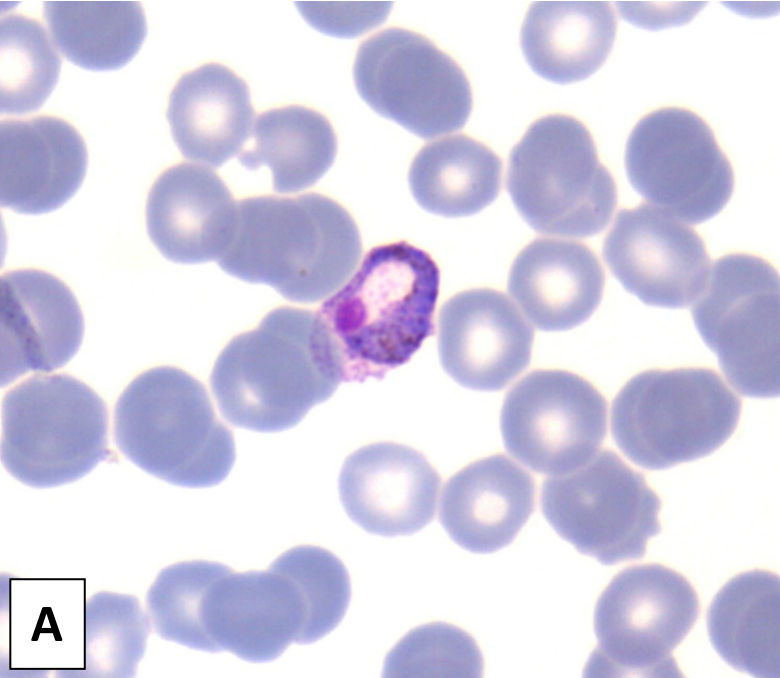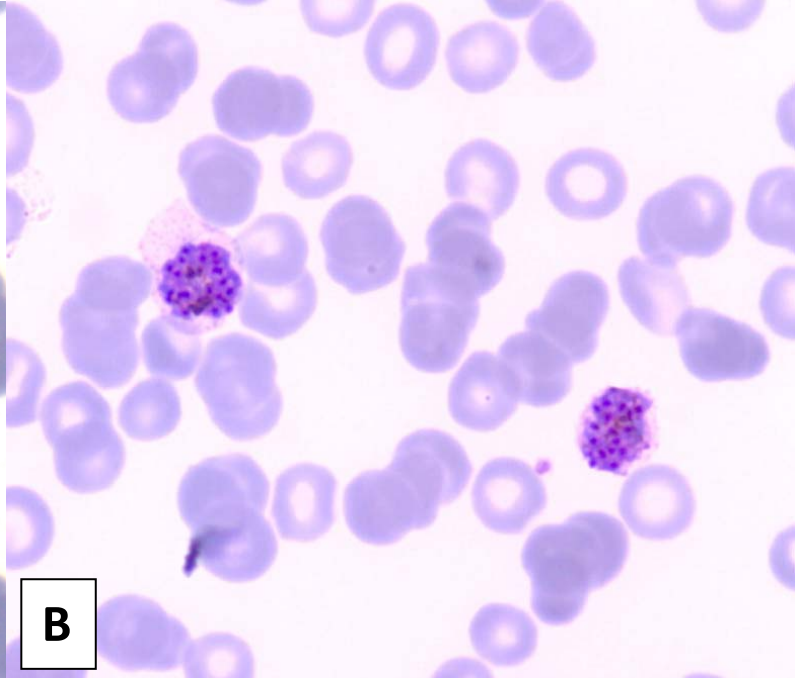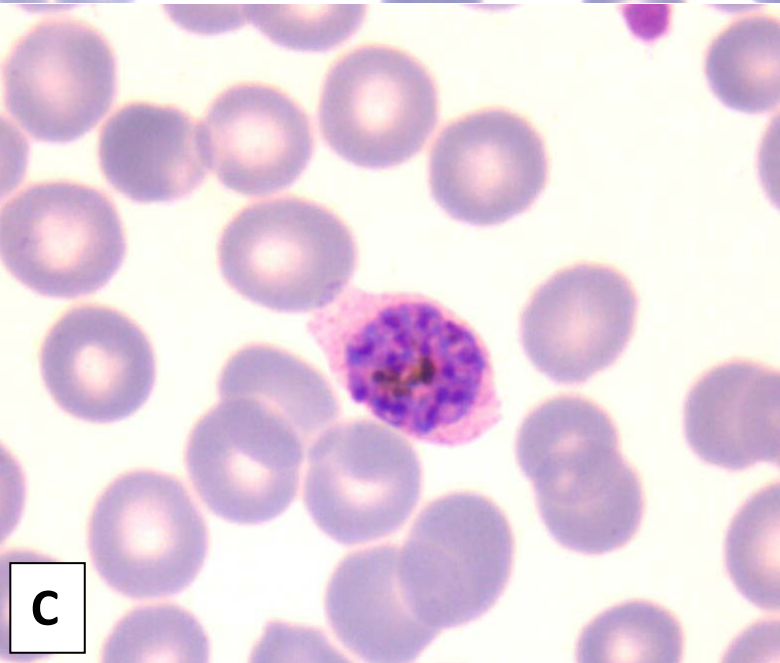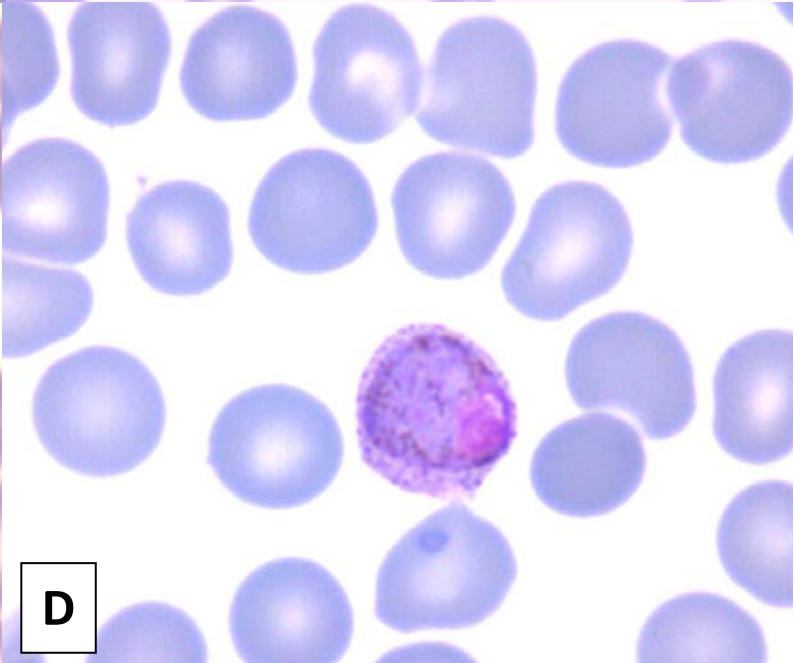

Supplement: MOESM1 [file 9543362]
